1 ***In silico* assessment of immune cross protection between BCoV and**  
2 **SARS-CoV-2**

3 Lana Bazan Peters Querne<sup>a</sup>, Fernanda Zettel Bastos<sup>a</sup>, Mikaela dos Anjos

4 Adur<sup>b</sup>, Vitória Cavalheiro<sup>c</sup>, Breno Castello Branco Beirão<sup>b,\*</sup>

5 <sup>a</sup> Programa de Pós-graduação em Engenharia de Bioprocessos e Biotecnologia, Universidade  
6 Federal do Paraná. Av. Cel. Francisco H. dos Santos, 100, Centro Politécnico, Curitiba, PR,  
7 Brazil, CEP 81531-980.

8 <sup>b</sup> Departamento de Patologia Básica, Universidade Federal do Paraná. Av. Cel. Francisco H.  
9 dos Santos, 100, Setor de Ciências Biológicas, Curitiba, PR, Brazil, CEP 81531-980.

10 <sup>c</sup> Imunova Análises Biológicas LTDA. R. Imaculada Conceição, 1430, Curitiba, PR, Brazil, CEP  
11 80215-182.

12 \*Corresponding author: [breno.beirao@ufpr.br](mailto:breno.beirao@ufpr.br)

13

14 **Abstract**

15 **Background:** Humans have long shared infectious agents with cattle, and the  
16 bovine-derived human common cold OC-43 CoV is a not-so-distant example of  
17 cross-species viral spill over of coronaviruses. Human exposure to the Bovine  
18 Coronavirus (BCoV) is certainly common, as the virus is endemic in most high-  
19 density cattle-raising regions. Since BCoVs are phylogenetically close to SARS-  
20 CoV-2, it is possible that cross-protection against COVID-19 occurs in people  
21 exposed to BCoV.

22 **Methods:** This article shows an *in silico* investigation of human cross-protection  
23 to SARS-CoV-2 due to BCoV exposure. We determined HLA recognition and  
24 human B lymphocyte reactivity to BCoV epitopes using bioinformatics  
25 resources. A retrospective geoepidemiological analysis of COVID-19 was then  
26 performed to verify if BCoV/SARS-CoV-2 cross-protection could have occurred  
27 in the field. Brazil was used as a model for the epidemiological analysis of the  
28 impact of livestock density – as a proxy for human exposure to BCoV – on the  
29 prevalence of COVID-19 in people.

30 **Results:** As could be expected from their classification in the same  
31 *Betacoronavirus* genus, we show that several human B and T epitopes are  
32 shared between BCoV and SARS-CoV-2. This raised the possibility of cross-  
33 protection of people from exposure to the bovine coronavirus. Analysis of field  
34 data added partial support to the hypothesis of viral cross-immunity from human  
35 exposure to BCoV. There was a negative correlation between livestock  
36 geographical density and COVID-19. Whole-Brazil data showed areas in the  
37 country in which COVID-19 prevalence was disproportionately low (controlled by

38 normalization by transport infrastructure). Areas with high cattle density had  
39 lower COVID-19 prevalence in these low-risk areas.

40 **Conclusions:** These data are hypothesis-raising indications that cross-  
41 protection is possibly being induced by human exposure to the Bovine  
42 Coronavirus.

43

44 **Keywords:** bovine coronavirus (BCoV); cross-reactivity; epitope; *in silico*;  
45 epidemiology; SARS-CoV-2.

## 46 **1. Background**

47 In December 2019 the Severe Acute Respiratory Syndrome Coronavirus  
48 2 (SARS-CoV-2) was discovered in Wuhan, in the Chinese province of Hubei  
49 (1). SARS-CoV-2 can cause Coronavirus Disease 2019 (COVID-19) and led to  
50 a pandemic pneumonia outbreak, declared on March 11, 2020 (2). The  
51 symptoms of infected people resemble those of viral pneumonia, such as  
52 cough, fever and discomfort when breathing (3). In elderly patients and patients  
53 with comorbidities (e.g., diabetes, obesity, and asthma) the development of  
54 severe cases with dyspnoea and bilateral pulmonary infiltration is more  
55 common, increasing the number of hospitalizations and deaths in this  
56 population (4).

57 Coronaviruses are single-stranded RNA viruses belonging to the  
58 *Coronaviridae* family, which infects several animal hosts. Within this range of  
59 hosts, coronaviruses cause respiratory, gastrointestinal, and neurological  
60 diseases. The four genera that compose this family are: *Alphacoronavirus*,  
61 *Betacoronavirus*, *Gammacoronavirus* and *Deltacoronavirus* (5,6). Among the  
62 Beta-coronaviruses are SARS-CoV-2 and Bovine Coronavirus (BCoV). The  
63 latter is responsible for livestock losses, causing diarrhoea in new-born calves  
64 and respiratory infections in calves and confined cattle (6,7). The genome of  
65 both viruses encodes similar structural proteins: envelope protein (E),  
66 membrane protein (M), nucleocapsid protein (N) and spike protein (S); BCoV  
67 expresses a hemagglutinin-esterase not present in SARS-CoV-2 (8); viruses  
68 also express homologous non-structural proteins (NSP) and open reading  
69 frame polyproteins (ORF) (6,9).

70 Cross-reactivity between coronaviruses is known to occur to some extent  
71 and might impact on the severity and spread of diseases (10). BCoV and  
72 SARS-CoV-2 are aggregated within the same viral genus which illustrates the  
73 high structural similarity between them – this is crucial for immune cross-  
74 reactivity (11,12). Importantly, there is a history of BCoV spill over to other  
75 species, including humans, which seems to have generated at least one of the  
76 current human coronaviruses that cause the common cold (8). It is possible that  
77 subclinical human infections with BCoV occur routinely, and there is even  
78 evidence of BCoV causing clinical signs in susceptible people (13,14).

79 Here, we performed an *in silico* analysis of the correlations between  
80 bovine and human coronaviruses. We conducted an immunological assessment  
81 of the epitopes of BCoV which may induce protective immune responses in  
82 humans against SARS-CoV-2. We searched for peptides originated from BCoV  
83 proteins M, N, S and ORF that potentially could induce T and B cell responses  
84 in people and that show high identity with SARS-CoV-2. We then used an  
85 epidemiological analysis to test the hypothesis that exposure to BCoV induces  
86 cross-protection against COVID-19 (cattle density was used as a proxy for  
87 BCoV exposure). The results presented here are an indication that BCoV may  
88 confer human cross-protection against SARS-CoV-2.

89

## 90 **2. Methods**

### 91 *2.1 Peptide setup for immunological assessment*

92 Proteome sequences of Bovine Coronavirus were obtained from the  
93 NCBI database and focused on four proteins (Table 1): spike protein (S),

94 membrane protein (M), nucleocapsid protein (N) and replicase polyprotein  
95 (Orf1ab). The entire protein sequences were organized in 15-mer peptides that  
96 overlapped by 10 amino acids, using a python code (15,16).

97

98 Table 1 – NCBI accession numbers of Bovine Coronavirus and SARS-CoV-2 protein sequences  
99 used in the present study.

|                      | <b>Bovine coronavirus</b> | <b>SARS-CoV-2</b> |
|----------------------|---------------------------|-------------------|
| Spike protein        | NP_150077.1               | YP_009724390.1    |
| Membrane protein     | NP_150082.1               | YP_009724393.1    |
| Nucleocapsid protein | NP_150084.1               | QQD86936.1        |
| Orf1ab               | NP_150073.3               | BCT04066.1        |

100 Orf1ab = replicase polyprotein.

101

## 102 *2.2 Prediction of T cell reactivity*

103 T cell reactivity of bovine coronavirus peptides was assessed by  
104 predicting their binding to human leukocyte antigen class II (HLA II) molecules  
105 using IEDB MHC II binding predictions tool (<http://tools.iedb.org/mhcii/>). Peptide  
106 binding was predicted to all HLA class II molecules. A 20% percentile rank cut-  
107 off was chosen as a universal prediction threshold (16).

108

## 109 *2.3 Prediction of B cell reactivity*

110 B cell reactivity of bovine coronavirus peptides was assessed using IEDB  
111 Bepipred Linear Epitope Prediction 2.0 (<http://tools.iedb.org/bcell/>). The  
112 residues with scores above the threshold (0.5) and with 5 amino acids or more  
113 were predicted to be part of an epitope (17,18).

114

## 115 *2.4 Similarity of BCoV peptides in relation to SARS-CoV-2 proteins*

116 All BCoV peptides that were above the thresholds in the analyses of T-  
117 and B cells were assessed for their similarity to the corresponding proteins of  
118 SARS-CoV-2 (Table 1) using the Multiple Sequence Alignment (Clustal Omega,  
119 <https://www.ebi.ac.uk/Tools/msa/clustalo/>). Sequences with an identity greater  
120 than or equal to 80% were selected as peptide matches (19).

121

## 122 *2.5 Epidemiology of COVID-19 and association with BCoV*

123 Spatial correlation between cattle and COVID-19 was assessed using  
124 data from Brazil. The country has large and well-defined areas with high cattle  
125 density. Also, within-state analyses allow for controlled comparison of COVID-  
126 19 risk factors, as the most important public policies that alter COVID-19 risks  
127 are more homogeneously distributed in a state level (20).

128 COVID-19 epidemiology was assessed from publicly available data (21).  
129 For a within-state analysis, the slope of increase of cases/100,000 people for  
130 each city in the Brazilian State of Mato Grosso do Sul (MS) was used (between  
131 January, 2020 and September, 2021) (21,22). The slope of COVID-19 cases  
132 was compared to the number of cattle/100,000 people for each municipality in  
133 the state (23).

134 As a control, the distance from each municipality to the major city in the  
135 subregion of the state was compared to the slope of COVID-19 cases (24).  
136 General efficiency of public spending (not directly correlated with COVID-19)  
137 was also used as a control in a correlation analysis with COVID-19 prevalence.  
138 Data from the literature on public investment were used. Spending rigor was  
139 scored from 1-4, with four being the best-quality public use of resources (25).

140 The correlation of the data with COVID-19 prevalence was assessed with run's  
141 test in a linear correlation.

142 Whole-country data from Brazil was assessed using QGIS 3.24.1 Tisler.  
143 COVID-19 data from every Brazilian municipality and the map of Brazilian roads  
144 were obtained from the Instituto Brasileiro de Geografia e Estatística (26).  
145 Cattle population localization and density was from a previously published  
146 dataset (27).

147 COVID-19 prevalence rates, road density and cattle populations were  
148 compared by pixel intensity of the respective rasterized layers using 'Point  
149 Sampling Tool Plugin' for QGIS (version 0.5.3, by Borys Jurgiel). A grid of dots  
150 was layered on top of the maps of interest for analysis using the plugin. The grid  
151 was positioned to cover the entirety of Brazilian territory south of the Equator,  
152 where cattle-raising regions are located. COVID-19 prevalence was corrected in  
153 relation to road density in the respective region. For this, every COVID-19 dot  
154 from the analysis grid was divided by the sum of the 9 surrounding road  
155 'intensity' dots.

156 Raw data used for epidemiological analysis is provided as a  
157 supplementary material.

158 GraphPad Prism 8 (GraphPad Software, Inc., USA) was used for  
159 graphing and for statistical analysis. All the data used for this analysis is  
160 available as supplementary material.

161

### 162 **3. Results**

#### 163 *3.1 Peptide setup for immunological assessment*



164 A total of 136, 23, 45 and 709 15-mer peptides that overlapped by 10  
165 amino acids were obtained for proteins S, M, N and ORF1ab respectively.

166

### 167 *3.2 Prediction of T cell reactivity*

168 From the results obtained by the IEDB MHC II binding prediction tool,  
169 106 peptides from protein S, 20 peptides from protein M, 24 peptides from  
170 protein N and 566 peptides from ORF1ab protein were above the selection  
171 threshold. All peptides obtained in this analysis are available as supplementary  
172 material.

173

### 174 *3.3 Prediction of B cell reactivity*

175 From the results obtained by the IEDB Bepipred Linear Epitope  
176 Prediction 2.0, 70 peptides from protein S, 9 peptides from protein M, 38  
177 peptides from protein N and 386 peptides from ORF1ab protein had scores  
178 above the threshold. All peptides obtained in this analysis are available as  
179 supplementary material.

180

### 181 *3.4 Similarity of BCoV peptides in relation to SARS-CoV-2 proteins*

182 Among the peptides that showed good results for putative human T or B  
183 cell interactions, only 2 peptides from protein S, 1 peptide from protein M, and 2  
184 peptides from protein N showed at least 80% similarity with SARS-CoV-2 (Table  
185 2). No peptide sequence from these three proteins was found to be above the  
186 cut-off values for both T cells and B cells.

187 Table 2 - Peptides from BCoV spike, membrane and nucleocapsid proteins that were likely to  
 188 induce human T- and B cell responses and that showed at least 80% similarity with SARS-CoV-  
 189 2.

| Peptide                     | T cell                                                                                                                    | Similarity (%) | B cell  | Similarity (%) |
|-----------------------------|---------------------------------------------------------------------------------------------------------------------------|----------------|---------|----------------|
| <b>Spike protein</b>        |                                                                                                                           |                |         |                |
| LEAQAQIDRLINGRL             | -                                                                                                                         | -              | QIDRLI  | 100,0          |
| VDVTNGLGTYVLDLR             | -                                                                                                                         | -              | LGTYV   | 80,0           |
| <b>Membrane protein</b>     |                                                                                                                           |                |         |                |
| TGSWWSFNPETNNLM             | -                                                                                                                         | -              | SFNPETN | 100,0          |
| <b>Nucleocapsid protein</b> |                                                                                                                           |                |         |                |
| PRWYFYLLGTGPHAK             | HLA-DRB5*01:01, HLA-DRB1*04:05, HLA-DRB1*11:01, HLA-DRB1*04:01, HLA-DRB1*01:01, HLA-DQA1*05:01/DQB1*03:01, HLA-DRB1*09:01 | 86,7           | -       | -              |
| VLPQGYIEGSGRSA              | -                                                                                                                         | -              | YIEGS   | 80,0           |

190

191 Regarding the ORF1ab protein, 107 peptides were above the threshold  
 192 for potential T- or B cell epitopes. In this case, 28 peptides were found to be  
 193 above the cut-off for both T cells and B cells (Table 3).

194

195 Table 3 - Peptides from replicase polyprotein (ORF1ab) that were likely to induce human T- and  
 196 B cell responses and that showed at least 80% similarity with SARS-CoV-2. The underlined  
 197 BCoV peptide sequence has been reported to induce protective anti-SARS-CoV-2 T cell  
 198 responses (28).

| Peptide                  | T cell                                                                                                                                                                                                | Similarity (%) | B cell   | Similarity (%) |
|--------------------------|-------------------------------------------------------------------------------------------------------------------------------------------------------------------------------------------------------|----------------|----------|----------------|
| HYVYIGDPAQLPAPR          | HLA-DRB3*01:01, HLA-DRB1*03:01, HLA-DQA1*05:01/DQB1*03:01, HLA-DRB1*13:02, HLA-DRB1*01:01, HLA-DRB1*04:05, HLA-DRB1*04:01                                                                             | 100,0          | GDPAQL   | 100,0          |
| YAISAKNRARTVAGV          | HLA-DRB1*11:01, HLA-DRB5*01:01, HLA-DRB1*13:02, HLA-DQA1*01:02/DQB1*06:02, HLA-DQA1*05:01/DQB1*03:01                                                                                                  | 100,0          | AKNRARTV | 100,0          |
| DVY <u>LPYPDPSR</u> ILGA | HLA-DRB3*01:01                                                                                                                                                                                        | 93,3           | YDPDSR   | 100,0          |
| IERFVSLAIDAYPLV          | HLA-DQA1*05:01/DQB1*02:01, HLA-DRB3*01:01, HLA-DRB1*01:01, HLA-DRB4*01:01, HLA-DRB1*03:01, HLA-DRB1*13:02, HLA-DQA1*01:01/DQB1*05:01, HLA-DRB1*07:01, HLA-DRB1*15:01, HLA-DPA1*01:03/DPB1*02:01, HLA- | 93,3           | SLAIDA   | 100,0          |

|                  |                                                                                                                                                                                                            |      |           |       |
|------------------|------------------------------------------------------------------------------------------------------------------------------------------------------------------------------------------------------------|------|-----------|-------|
|                  | DRB1*12:01, HLA-DQA1*03:01/DQB1*03:02, HLA-DPA1*02:01/DPB1*01:01, HLA-DRB1*04:05, HLA-DRB1*04:01, HLA-DRB1*09:01                                                                                           |      |           |       |
| KPGGTSSGDATTAFA  | HLA-DQA1*05:01/DQB1*03:01, HLA-DRB3*01:01                                                                                                                                                                  | 93,3 | TSSGDATT  | 100,0 |
| LYYQNNVFMSESKCW  | HLA-DPA1*02:01/DPB1*01:01, HLA-DPA1*01:03/DPB1*02:01, HLA-DRB1*04:01                                                                                                                                       | 93,3 | VMSE      | 100,0 |
| KYTQLCQYLNTTTLA  | HLA-DRB1*04:05, HLA-DRB1*04:01, HLA-DRB1*01:01, HLA-DRB1*15:01                                                                                                                                             | 93,3 | CQYLNT    | 100,0 |
| YNLWNTFTKLQSLEN  | HLA-DQA1*01:02/DQB1*06:02, HLA-DRB1*11:01, HLA-DRB1*08:02, HLA-DRB1*04:05, HLA-DRB1*04:01, HLA-DPA1*01:03/DPB1*02:01, HLA-DPA1*02:01/DPB1*01:01, HLA-DRB5*01:01, HLA-DPA1*03:01/DPB1*04:02, HLA-DRB1*09:01 | 93,3 | FTKLQ     | 80,0  |
| CSQSDRFYRLANECA  | HLA-DRB1*04:05, HLA-DPA1*01:03/DPB1*02:01, HLA-DRB1*01:01, HLA-DRB1*04:01                                                                                                                                  | 86,7 | DRFYR     | 80,0  |
| DLKHFFFTQDGNAAI  | HLA-DRB3*01:01, HLA-DRB1*01:01, HLA-DRB1*04:05, HLA-DRB1*13:02, HLA-DPA1*01:03/DPB1*02:01, HLA-DRB1*07:01, HLA-DRB1*04:01                                                                                  | 86,7 | FTQDGN    | 83,3  |
| KFQTVKPGNFNQDFY  | HLA-DRB5*01:01, HLA-DRB1*07:01                                                                                                                                                                             | 86,7 | VKPGNFNQ  | 87,5  |
| LPTLTQMNLKYAISA  | HLA-DRB1*09:01, HLA-DQA1*01:02/DQB1*06:02, HLA-DRB1*12:01, HLA-DRB4*01:01                                                                                                                                  | 86,7 | QMNLKY    | 100,0 |
| NNGPHEFCSQHTMLV  | HLA-DRB1*04:05, HLA-DRB1*07:01, HLA-DRB1*04:01                                                                                                                                                             | 86,7 | FCSQH     | 100,0 |
| SVINARIRAKHYVYI  | HLA-DRB1*13:02, HLA-DRB1*15:01, HLA-DRB1*11:01, HLA-DRB1*12:01, HLA-DRB5*01:01                                                                                                                             | 86,7 | IRAKH     | 80,0  |
| VGILTLDNQLNGKW   | HLA-DRB3*01:01, HLA-DRB4*01:01, HLA-DRB1*04:05, HLA-DRB1*03:01                                                                                                                                             | 86,7 | LDNQLDN   | 100,0 |
| GSLYV NKHAFHTKPF | HLA-DRB5*01:01                                                                                                                                                                                             | 86,7 | VNKHAFH   | 100,0 |
| VVCRFDTRVLNNLNL  | HLA-DPA1*03:01/DPB1*04:02, HLA-DRB1*03:01, HLA-DPA1*02:01/DPB1*01:01, HLA-DRB1*15:01                                                                                                                       | 86,7 | FDTRVLN   | 85,7  |
| ACVVCSSQTSRLCGS  | HLA-DRB1*03:01, HLA-DQA1*01:02/DQB1*06:02                                                                                                                                                                  | 80,0 | CSSQTSRLR | 87,5  |
| CIHCANFNILFSMV   | HLA-DQA1*01:02/DQB1*06:02, HLA-DPA1*01:03/DPB1*02:01, HLA-DPA1*02:01/DPB1*01:01, HLA-DRB1*15:01, HLA-DRB1*13:02, HLA-DPA1*03:01/DPB1*04:02                                                                 | 80,0 | NFNIL     | 80,0  |
| KGLLKEGSSVDLKHf  | HLA-DRB1*04:01, HLA-DRB1*07:01                                                                                                                                                                             | 80,0 | KEGSSVD   | 85,7  |
| NNYDKSAGYPFNKFG  | HLA-DRB1*07:01, HLA-DRB3*01:01                                                                                                                                                                             | 80,0 | KSAGYPF   | 85,7  |
| VLGLQTQTVDSAQGS  | HLA-DRB1*04:01, HLA-DRB1*01:01, HLA-DRB4*01:01                                                                                                                                                             | 80,0 | TQTVDSA   | 85,7  |
| WYDFVENPDIINVYK  | HLA-DRB3*01:01                                                                                                                                                                                             | 80,0 | VENPDII   | 85,7  |
| DMAKFPLKLAGTAVI  | HLA-DRB1*01:01, HLA-DRB1*07:01, HLA-DRB1*09:01, HLA-DRB1*08:02, HLA-DRB1*13:02, HLA-DRB1*11:01, HLA-DRB1*04:01, HLA-DRB1*15:01                                                                             | 80,0 | PLKLAG    | 83,3  |
| GTNFPLQLGFSTGID  | HLA-DRB1*07:01, HLA-DRB1*09:01, HLA-DRB1*01:01                                                                                                                                                             | 80,0 | QLGFS     | 100,0 |

|                 |                                                                                                                                                                                           |      |         |       |
|-----------------|-------------------------------------------------------------------------------------------------------------------------------------------------------------------------------------------|------|---------|-------|
| LIISDMYDPITKNIG | HLA-DRB3*01:01, HLA-DRB1*03:01                                                                                                                                                            | 80,0 | DMYDPIT | 85,7  |
| MIRDKLALGGSVAIK | HLA-DQA1*05:01/DQB1*03:01, HLA-DRB1*01:01, HLA-DRB1*09:01, HLA-DRB1*07:01, HLA-DRB1*13:02, HLA-DRB1*04:01                                                                                 | 80,0 | KLALGGS | 100,0 |
| PGEQFKHLIPLMTRG | HLA-DRB1*01:01, HLA-DRB1*11:01, HLA-DRB1*04:01, HLA-DRB1*04:05, HLA-DRB1*08:02, HLA-DRB5*01:01, HLA-DRB1*09:01, HLA-DRB4*01:01, HLA-DRB1*12:01, HLA-DPA1*03:01/DPB1*04:02, HLA-DRB1*07:01 | 80,0 | KHLIPL  | 100,0 |

199

200

### 201 *3.5 Epidemiology of COVID-19 and association with BCoV*

202 To test the hypothesis that BCoV exposure may lead to COVID-19 cross-  
203 reactive immunity, we performed an epidemiological assessment of the  
204 correlation between these factors. We analysed the correlation of COVID-19  
205 prevalence to the density of cattle in the Brazilian state of MS. This was  
206 performed as an initial investigation into the epidemiological association  
207 between human exposure to the Bovine Coronavirus (BCoV) and altered  
208 pandemic spread. Cattle density was used as a proxy for BCoV exposure.

209 Cattle density (cattle/100,000 people) negatively correlated with the  
210 slope of COVID-19 case increase in MS. In opposition, confounding factors in  
211 this epidemiological analysis showed no association with the slope of COVID-19  
212 cases in the state (assessed factors were distance of each municipality to the  
213 main regional hub city and quality of public spending) (Fig. 1).

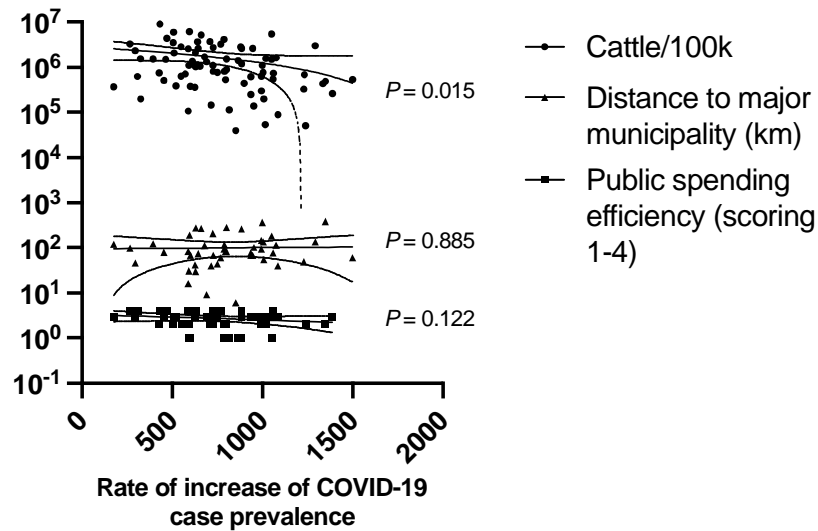

214

215 Figure 1 - Linear regression between cattle density and the slope of cumulative COVID-19 case  
216 increase in the Brazilian State of Mato Grosso do Sul (MS). Data between Jan/20 and Sep/21  
217 were used. Cattle density was calculated as the number of cattle/100,000 people in the  
218 municipality. The distance of the municipality to the major hub city was used to control for lower  
219 people connectivity of cattle-raising areas. Public spending efficiency was used to control for  
220 possible slower responses to the COVID-19 pandemic from cattle-raising municipalities.  
221 Analysis by run's test in a linear regression. *P*-values are shown next to each regression. The  
222 dotted lines around the linear regression trend indicate the 99% CI.

223

224 In a second proof-of-concept epidemiological analysis, we determined the  
225 statistical correlation between a) COVID-19 prevalence throughout the country of  
226 Brazil; b) the density of cattle populations in the respective areas. As a normalizer for  
227 the data, human circulation was determined by assessing road density in the area.

228 Brazilian municipalities were classified as either a) having less COVID-19 cases  
229 than expected by the surrounding road infrastructure or, b) having more COVID-19  
230 cases than expected by the surrounding road infrastructure. In the former low-risk  
231 cohort, bovine density was negatively correlated to COVID-19 prevalence (Fig. 2).

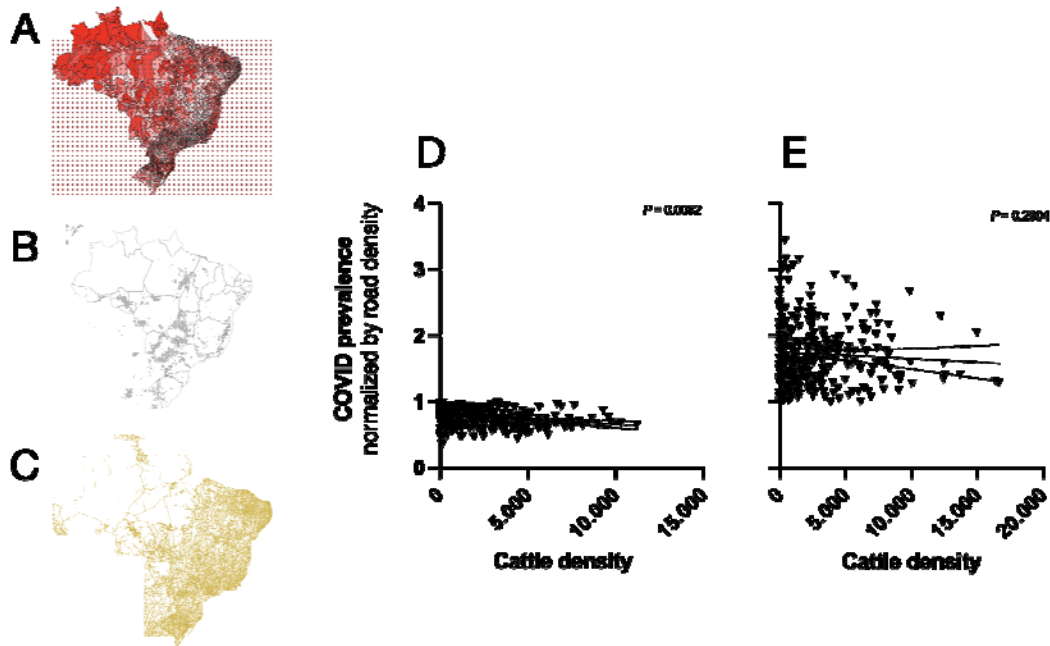

232

233 Figure 2 – Cattle density was negatively associated to COVID-19 prevalence in Brazil. COVID-  
234 19 prevalence (A, in red) and cattle density (B, gray shades) were assessed using a geographic  
235 information system. Road density (C) was also assessed as a control for the relevance of  
236 human movement in COVID-19 prevalence. Although not shown, the dotted grid applied in (A)  
237 was also in (B) and (C) for the respective measurements. The effect of cattle density was  
238 assessed separately in areas with low (D) and high risk (E) (as expected from road density).  
239 The *P* value indicates departure from linearity for the correlation lines by run's test. The dashed  
240 line indicates 95% CI.

241

#### 242 4. Discussion

243 Bovine coronaviruses (BCoV) are members of the *Betacoronavirus*  
244 genus along with SARS-CoV-2, denoting their structural similarities. Further,  
245 within the *Betacoronavirus*, BCoV is among the most similar viruses to SARS-  
246 CoV-2 (29,30). Indeed, cattle can be experimentally infected with SARS-CoV-2  
247 (31–33) and bovine coronaviruses have spilled over to humans before - current  
248 strains of BCoV can be cultured in human rectal adenocarcinoma cells,

249 demonstrating that cross-species infection is still a risk, if not a common event  
250 already (6,34,35). Other works have already discussed the immunological  
251 impacts that coronaviruses of domestic animals could have on humans. In  
252 Brazil, the use of the *Deltacoronavirus* Avian Infectious Bronchitis is being  
253 clinically tested for COVID-19 vaccination, for instance [11, 24].

254 The hypothesis raised here is that BCoV exposure influences human  
255 immune responses to COVID-19. We started our evaluation of the cross-  
256 protection between BCoV and SARS-CoV by assessing *in silico* if BCoV  
257 epitopes could be recognized by human B and T lymphocytes. Here, we report  
258 several BCoV epitopes which are likely to be important in the immune response  
259 against COVID-19. This analysis is valuable in confirming that infectious  
260 exposure to the bovine coronavirus can theoretically induce SARS-CoV-2  
261 cross-reactive immune responses – although it must be made clear that human  
262 infectivity of BCoV cannot be confirmed with the present analysis.

263 Since BCoV shares epitopes with SARS-CoV-2, it is possible that  
264 COVID-19 epidemiology was shaped by human exposure to BCoV, much as  
265 smallpox was naturally curtailed by the exposure to cowpox, for instance (36).  
266 BCoV naturally and widely occurs in densely populated bovine herds (14) and  
267 there is evidence of human transmission (37). In this scenario, BCoV exposure  
268 would be one among other interacting factors in COVID-19 spread, such as  
269 income and social vulnerability levels (38). The results from the Brazilian state  
270 of MS and the wider analysis of the country were supportive of the hypothesis  
271 that human exposure to cattle had an impact on the epidemiology of COVID-19.

272           The state of MS was chosen as a proof-of-concept case study, as it is a  
273 large beef producer with no megacities, which can “distort” the local  
274 epidemiological status due to their large influence on the statistics and due to  
275 their disproportionate worldwide connections in relation to other towns (39,40).  
276 For Brazil, within-state infrastructure, scholarship, income and animal production  
277 conditions are more homogeneous than in inter-state comparisons (41,42), thus  
278 explaining the choice of a state for the preliminary epidemiological analysis.

279           COVID-19 data from MS was compared against general efficiency of  
280 public spending – an important factor in the spread and control of the pandemic  
281 in Brazil (43) – and against distance to major city hubs. Municipalities with more  
282 cattle are expected to be further away from regional hubs, since large land  
283 areas are needed for extensive bovine farming. Therefore, any association  
284 between COVID-19 cases with cattle density could possibly be due to lower  
285 connectivity of the municipality, which is a major cause of spatial proliferation of  
286 the disease (44). These data were freely available and were therefore used for  
287 the analysis of the state of MS. Within MS, cattle density was negatively  
288 correlated to COVID-19 cases, being more significant in explaining pandemic  
289 expansion than common biases, public spending efficiency and distance to  
290 major cities.

291           Whole-country Brazilian COVID-19 data demonstrated an interesting  
292 pattern in which some municipalities were more “benefitted” from exposure to  
293 cattle. COVID-19 prevalence was corrected for road density, creating an index  
294 of cities that had higher or lower COVID-19 prevalence than theoretically  
295 expected based on road density (an inference of populational movements,



296 which highly alter infectious disease spread (45,46)). “Lower-than-expected”  
297 COVID-19 rates could indicate a myriad of factors, such as better health  
298 systems or stricter municipal COVID-19 control laws. In this case, the results  
299 would indicate that BCoV exposure only benefited human populations that had  
300 low risks for COVID-19. High SARS-CoV-2 exposure may have overcome any  
301 benefits conferred by previous contact with BCoV. Regional road density may  
302 also not have appropriately normalized COVID-19 prevalence, as it is a single  
303 and limited control (47).

304 It must be stressed that it was not the goal of this study to prove the  
305 association of BCoV with COVID-19 using epidemiological data. Our analysis is  
306 exceedingly restricted for this purpose. Nevertheless, these results are an  
307 indication of immune cross-reactivity and potential protection from COVID-19  
308 from exposure to BCoV. These data prompt further experimental analyses of  
309 the effect of BCoV in people.

310

## 311 **5. Conclusion**

312 SARS-CoV-2 and BCoV share several common epitopes, which may  
313 confer cross-immunity. The relevance of this for the development of the  
314 pandemic is yet not known and should be proven with controlled trials of human  
315 responses to the bovine virus. Nevertheless, our results for the correlation  
316 between COVID-19 prevalence and cattle density are an indication of the role of  
317 human exposure to BCoV with regards to the development of the pandemic.

318

## 319 **List of abbreviations**

320 BCoV, Bovine Coronavirus; MS, Mato Grosso do Sul [State of Brazil];

321

322 **Ethical approval and consent to participate**

323 Not required.

324 **Consent for publication**

325 Not applicable.

326 **Availability of data and materials**

327 All data generated or analysed during this study are included in this published

328 article [and its supplementary information files].

329 **Competing interests**

330 The authors declare that they have no competing interests.

331 **Funding**

332 This work was supported by the Coordenação de Aperfeiçoamento de Pessoal

333 de Nível Superior (CAPES) [grant number 88881.505280/2020-01].

334 **Author contributions**

335 LBPQ and FZB performed the molecular analyses with viral genomic data. VC,

336 MAA and BCBB performed the epidemiological analyses. LBPQ, FZB and

337 BCBB wrote the article. BCBB provided funding for the research.

338 **Acknowledgments**

339 Not applicable.

340

## 341 References

- 342 1. Walls AC, Park YJ, Tortorici MA, Wall A, McGuire AT, Velesler D. Structure,  
343 Function, and Antigenicity of the SARS-CoV-2 Spike Glycoprotein. *Cell*. 2020  
344 Apr 16;181(2):281-292.e6.
- 345 2. WHO Coronavirus (COVID-19) Dashboard | WHO Coronavirus (COVID-19)  
346 Dashboard With Vaccination Data [Internet]. [cited 2023 Jun 25]. Available from:  
347 <https://covid19.who.int/>
- 348 3. Chen Y, Li L. SARS-CoV-2: virus dynamics and host response. *Lancet Infect Dis*  
349 [Internet]. 2020 May 1 [cited 2023 Jun 25];20(5):515–6. Available from:  
350 <https://pubmed.ncbi.nlm.nih.gov/32213336/>
- 351 4. Hu B, Guo H, Zhou P, Shi ZL. Characteristics of SARS-CoV-2 and COVID-19.  
352 *Nature Reviews Microbiology* 2020 19:3 [Internet]. 2020 Oct 6 [cited 2023 Jun  
353 25];19(3):141–54. Available from: [https://www.nature.com/articles/s41579-020-](https://www.nature.com/articles/s41579-020-00459-7)  
354 [00459-7](https://www.nature.com/articles/s41579-020-00459-7)
- 355 5. Wu D, Wu T, Liu Q, Yang Z. The SARS-CoV-2 outbreak: What we know.  
356 *International Journal of Infectious Diseases* [Internet]. 2020 May 1 [cited 2023  
357 Jun 25];94:44. Available from: [/pmc/articles/PMC7102543/](https://pubmed.ncbi.nlm.nih.gov/32213336/)
- 358 6. Vlasova AN, Saif LJ. Bovine Coronavirus and the Associated Diseases. *Front*  
359 *Vet Sci*. 2021 Mar 31;8.
- 360 7. Takiuchi E, Alfieri AF, Alfieri AA. Molecular analysis of the bovine coronavirus S1  
361 gene by direct sequencing of diarrheic fecal specimens. *Braz J Med Biol Res*  
362 [Internet]. 2008 [cited 2023 Jun 25];41(4):277–82. Available from:  
363 <https://pubmed.ncbi.nlm.nih.gov/18392449/>
- 364 8. Lang Y, Li W, Li Z, Koerhuis D, Van Den Burg ACS, Rozemuller E, et al.  
365 Coronavirus hemagglutinin-esterase and spike proteins coevolve for functional  
366 balance and optimal virion avidity. [cited 2023 Jun 25]; Available from:  
367 <https://www.pnas.org>
- 368 9. Kung YA, Lee KM, Chiang HJ, Huang SY, Wu CJ, Shih SR. Molecular Virology  
369 of SARS-CoV-2 and Related Coronaviruses. *Microbiology and Molecular Biology*  
370 *Reviews*. 2022 Jun 15;86(2).
- 371 10. Ellis J, Sniatynski M, Rapin N, Lacoste S, Erickson N, Haines D. SARS  
372 coronavirus 2-reactive antibodies in bovine colostrum. *Can Vet J* [Internet]. 2023  
373 [cited 2023 Jun 24];337–43. Available from:  
374 <https://www.ncbi.nlm.nih.gov/pmc/articles/PMC10031788>
- 375 11. Lee CH, Pinho MP, Buckley PR, Woodhouse IB, Ogg G, Simmons A, et al.  
376 Potential CD8+ T cell cross-reactivity against SARS-CoV-2 conferred by other  
377 coronavirus strains. *Front Immunol*. 2020;11:579480.
- 378 12. What happened to the Covid vaccines Brazil promised to develop? [Internet].  
379 [cited 2023 Jul 6]. Available from:  
380 <https://brazilian.report/society/2023/06/09/covid-vaccines-promised-develop/>
- 381 13. Virant MJ, Černe D, Petrovec M, Paller T, Toplak I. Genetic characterisation and  
382 comparison of three human coronaviruses (Hku1, oc43, 229e) from patients and  
383 bovine coronavirus (bcov) from cattle with respiratory disease in Slovenia.  
384 *Viruses* [Internet]. 2021 Apr 1 [cited 2023 Jun 25];13(4). Available from:  
385 [/pmc/articles/PMC8071153/](https://pubmed.ncbi.nlm.nih.gov/32213336/)

- 386 14. Zhu Q, Li B, Sun D. Advances in Bovine Coronavirus Epidemiology. *Viruses*  
387 [Internet]. 2022 May 1 [cited 2023 Jun 25];14(5):1109. Available from:  
388 <https://www.mdpi.com/1999-4915/14/5/1109/htm>
- 389 15. Sanchez-Trincado JL, Gomez-Perosanz M, Reche PA. Fundamentals and  
390 Methods for T- and B-Cell Epitope Prediction. *J Immunol Res* [Internet]. 2017  
391 [cited 2023 Jul 6];2017. Available from:  
392 <https://pubmed.ncbi.nlm.nih.gov/29445754/>
- 393 16. Paul S, Sidney J, Peters B, Sette A. Development and validation of a broad  
394 scheme for prediction of HLA class II restricted T cell epitopes. In: *Proceedings*  
395 *of the 5th ACM Conference on Bioinformatics, Computational Biology, and*  
396 *Health Informatics*. 2014. p. 733–8.
- 397 17. Gasteiger E, Hoogland C, Gattiker A, Duvaud S, Wilkins MR, Appel RD, et al.  
398 Protein identification and analysis tools on the ExPASy server. Springer; 2005.
- 399 18. Jespersen MC, Peters B, Nielsen M, Marcatili P. BepiPred-2.0: improving  
400 sequence-based B-cell epitope prediction using conformational epitopes. *Nucleic*  
401 *Acids Res* [Internet]. 2017 Jul 3 [cited 2023 Jul 6];45(W1):W24–9. Available  
402 from: <https://dx.doi.org/10.1093/nar/gkx346>
- 403 19. Reche PA. Potential cross-reactive immunity to SARS-CoV-2 from common  
404 human pathogens and vaccines. *Front Immunol*. 2020;2694.
- 405 20. Informações básicas municipais [Internet]. [cited 2023 Jun 25]. Available from:  
406 [http://tabnet.fiocruz.br/dhx.exe?observatorio/fat\\_indicadores.def](http://tabnet.fiocruz.br/dhx.exe?observatorio/fat_indicadores.def)
- 407 21. Covid19 por Município - Brasil.IO [Internet]. [cited 2023 Jul 6]. Available from:  
408 <https://brasil.io/covid19/>
- 409 22. Islam ARMT, Hasanuzzaman M, Shammi M, Salam R, Bodrud-Doza M, Rahman  
410 MM, et al. Are meteorological factors enhancing COVID-19 transmission in  
411 Bangladesh? Novel findings from a compound Poisson generalized linear  
412 modeling approach. *Environmental Science and Pollution Research*.  
413 2021;28:11245–58.
- 414 23. Pesquisa da Pecuária Municipal | IBGE [Internet]. [cited 2023 Jul 6]. Available  
415 from: <https://www.ibge.gov.br/estatisticas/economicas/agricultura-e-pecuaria/9107-producao-da-pecuaria-municipal.html>
- 416 24. Estudo da Dimensão Territorial do Estado de MS: Regiões de Planejamento –  
417 SEMADESC [Internet]. [cited 2023 Jul 6]. Available from:  
418 [https://www.semadesc.ms.gov.br/estudo-da-dimensao-territorial-do-estado-de-](https://www.semadesc.ms.gov.br/estudo-da-dimensao-territorial-do-estado-de-ms-regioes-de-planejamento/)  
419 [ms-regioes-de-planejamento/](https://www.semadesc.ms.gov.br/estudo-da-dimensao-territorial-do-estado-de-ms-regioes-de-planejamento/)
- 420 25. Dorsa ACC, Taveira JC, Pereira MS, Santos FK, Costa RB. Eficiência dos  
421 municípios de Mato Grosso do Sul: uma abordagem baseada em fronteira  
422 determinística. *Interações (Campo Grande)*. 2020;21:663–80.
- 423 26. Portal de mapas do IBGE [Internet]. [cited 2022 Apr 15]. Available from:  
424 <https://portaldemapas.ibge.gov.br/portal.php#homepage>
- 425 27. Gilbert M, Nicolas G, Cinardi G, Van Boeckel TP, Vanwambeke SO, Wint GRW,  
426 et al. Global distribution data for cattle, buffaloes, horses, sheep, goats, pigs,  
427 chickens and ducks in 2010. *Sci Data*. 2018;5.
- 428 28. Swaminathan S, Lineburg KE, Ambalathingal GR, Crooks P, Grant EJ, Mohan S  
429 V., et al. Limited Recognition of Highly Conserved Regions of SARS-CoV-2.  
430

- 431 Microbiol Spectr [Internet]. 2022 Feb 23 [cited 2023 Jun 25];10(1). Available  
432 from: <https://journals.asm.org/doi/10.1128/spectrum.02780-21>
- 433 29. Zhou H, Ji J, Chen X, Bi Y, Li J, Wang Q, et al. Identification of novel bat  
434 coronaviruses sheds light on the evolutionary origins of SARS-CoV-2 and  
435 related viruses. *Cell* [Internet]. 2021 Aug 19 [cited 2023 Jul 6];184(17):4380-  
436 4391.e14. Available from: <https://pubmed.ncbi.nlm.nih.gov/34147139/>
- 437 30. Tilocca B, Soggiu A, Musella V, Britti D, Sanguinetti M, Urbani A, et al. Molecular  
438 basis of COVID-19 relationships in different species: a one health perspective.  
439 *Microbes Infect*. 2020 May 1;22(4–5):218–20.
- 440 31. Ulrich L, Wernike K, Hoffmann D, Mettenleiter TC, Beer M. Experimental  
441 Infection of Cattle with SARS-CoV-2. *Emerg Infect Dis* [Internet]. 2020 Dec 1  
442 [cited 2023 Jul 6];26(12):2979–81. Available from:  
443 <https://pubmed.ncbi.nlm.nih.gov/33034284/>
- 444 32. Fusco G, Cardillo L, Levante M, Brandi S, Picazio G, Napoletano M, et al. First  
445 serological evidence of SARS-CoV-2 natural infection in small ruminants: Brief  
446 report. *Vet Res Commun*. 2023;
- 447 33. Bosco-Lauth AM, Walker A, Guilbert L, Porter S, Hartwig A, McVicker E, et al.  
448 Susceptibility of livestock to SARS-CoV-2 infection. *Emerg Microbes Infect*.  
449 2021;10(1):2199–201.
- 450 34. Brüssow H, Brüssow L. Clinical evidence that the pandemic from 1889 to 1891  
451 commonly called the Russian flu might have been an earlier coronavirus  
452 pandemic. *Microb Biotechnol* [Internet]. 2021 Sep 1 [cited 2023 Jul  
453 6];14(5):1860–70. Available from: <https://pubmed.ncbi.nlm.nih.gov/34254725/>
- 454 35. Stipp DT. Detecção do coronavírus bovino em episódios de diarreia neonatal em  
455 rebanhos bovinos brasileiros. 2007;
- 456 36. Riedel S. Edward Jenner and the history of smallpox and vaccination. *Proc (Bayl  
457 Univ Med Cent)* [Internet]. 2005 Jan 1 [cited 2023 Jul 6];18(1):21. Available from:  
458 </pmc/articles/PMC1200696/>
- 459 37. Zhu Q, Li B, Sun D. Advances in Bovine Coronavirus Epidemiology. *Viruses*  
460 [Internet]. 2022 May 1 [cited 2023 Jun 25];14(5). Available from:  
461 <https://www.ncbi.nlm.nih.gov/pmc/articles/PMC9147158>
- 462 38. Cestari VRF, Florêncio RS, Sousa GJB, Garces TS, Maranhão TA, Castro RR,  
463 et al. Social vulnerability and COVID-19 incidence in a Brazilian metropolis. *Cien  
464 Saude Colet* [Internet]. 2021 Mar 1 [cited 2023 Jul 6];26(3):1023–33. Available  
465 from: <https://pubmed.ncbi.nlm.nih.gov/33729356/>
- 466 39. Ren H, Zhao L, Zhang A, Song L, Liao Y, Lu W, et al. Early forecasting of the  
467 potential risk zones of COVID-19 in China's megacities. *Science of the Total  
468 Environment*. 2020 Aug 10;729.
- 469 40. Urban densities and the Covid-19 pandemic: Upending the sustainability myth of  
470 global megacities | ORF [Internet]. [cited 2023 Jul 6]. Available from:  
471 [https://www.orfonline.org/research/urban-densities-and-the-covid-19-pandemic-  
472 upending-the-sustainability-myth-of-global-megacities-65606/](https://www.orfonline.org/research/urban-densities-and-the-covid-19-pandemic-upending-the-sustainability-myth-of-global-megacities-65606/)
- 473 41. Lebioda L, Cabral GO, Tezza R. A Homogeneidade da Inclusão Digital no Brasil:  
474 Sonho ou Realidade? *Revista Informação na Sociedade Contemporânea*  
475 [Internet]. 2019 Dec 30 [cited 2023 Jul 6];3(1):1–18. Available from:  
476 <https://periodicos.ufrn.br/informacao/article/view/19118>

- 477 42. Krawczyk NR, Vieira VL. Homogeneidade e heterogeneidade nos sistemas  
478 educacionais: Argentina, Brasil, Chile e México. *Cadernos de Pesquisa*  
479 [Internet]. 2006 Sep [cited 2023 Jul 6];36(129):673–704. Available from:  
480 <https://www.scielo.br/j/cp/a/VJN8jzhCtnBpkkyMPs4qD6y/?lang=pt>
- 481 43. Szylovec A, Umbelino-Walker I, Cain BN, Ng HT, Flahault A, Rozanova L.  
482 Brazil's Actions and Reactions in the Fight Against COVID-19 from January to  
483 March 2020. *Int J Environ Res Public Health* [Internet]. 2021 Jan 2 [cited 2023  
484 Jul 6];18(2):1–16. Available from: <https://pubmed.ncbi.nlm.nih.gov/33440812/>
- 485 44. Jo Y, Hong A, Sung H. Density or Connectivity: What Are the Main Causes of  
486 the Spatial Proliferation of COVID-19 in Korea? *Int J Environ Res Public Health*  
487 [Internet]. 2021 May 2 [cited 2023 Jul 6];18(10). Available from:  
488 <https://pubmed.ncbi.nlm.nih.gov/34065031/>
- 489 45. Khavarian-Garmsir AR, Sharifi A, Moradpour N. Are high-density districts more  
490 vulnerable to the COVID-19 pandemic? *Sustain Cities Soc*. 2021 Jul  
491 1;70:102911.
- 492 46. Guan C, Tan J, Hall B, Liu C, Li Y, Cai Z. The Effect of the Built Environment on  
493 the COVID-19 Pandemic at the Initial Stage: A County-Level Study of the USA.  
494 *Sustainability (Switzerland)* [Internet]. 2022 Mar 1 [cited 2023 Jun  
495 25];14(6):3417. Available from: <https://www.mdpi.com/2071-1050/14/6/3417/htm>
- 496 47. Coura-Vital W, Cardoso DT, Ker FT de O, Magalhães FDC, Bezerra JMT,  
497 Viegas AM, et al. Spatiotemporal dynamics and risk estimates of COVID-19  
498 epidemic in Minas Gerais State: analysis of an expanding process. *Rev Inst Med*  
499 *Trop Sao Paulo* [Internet]. 2021 Mar 24 [cited 2022 Apr 15];63. Available from:  
500 <http://www.scielo.br/j/rimtsp/a/yfqPmQ5SyDCscbmy7gbhFsD/?lang=en>  
501
- 502



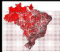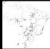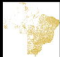

Source: https://www.biorxiv.org/content/10.1101/2024.01.25.577193.full.pdf
